# Supplementary material for: Mixing Online and Face-to-Face Therapy: How to Benefit From Blended Care in Mental Health Care
Source: PubMed Central journal article supplement (PMC4764785; doi:10.2196/mental.4534), 2016-02-09
Supplement: mental_v3i1e9_app1.pdf [file mental_v3i1e9_app1.pdf]

Developing an instrument to predict treatment success in blended care for depression: an overview of predictors found in literature

**Table 1.** Studies that address predictors, determinants, and motivators for use, acceptance, or effect of online therapy for depression or fear.

| Article                         | Type of intervention and target group                                                                                                                          | Study type                                                                                        | Determinants or predictors under study                                                                                                                                             | Outcomes                                                                                                                                                                                                                                                                                                                                                                                                                                                                                                         |
|---------------------------------|----------------------------------------------------------------------------------------------------------------------------------------------------------------|---------------------------------------------------------------------------------------------------|------------------------------------------------------------------------------------------------------------------------------------------------------------------------------------|------------------------------------------------------------------------------------------------------------------------------------------------------------------------------------------------------------------------------------------------------------------------------------------------------------------------------------------------------------------------------------------------------------------------------------------------------------------------------------------------------------------|
| [1]<br>Batterham,<br>2008 (AUS) | Online self-help CBT for depression; MoodGYM<br>Duration: 5 weeks<br>Target group: community                                                                   | Logistic regression to identify predictors of adherence                                           | <ul style="list-style-type: none"> <li>▪ Demographics</li> <li>▪ Severity of depression</li> <li>▪ Disfunctional thinking</li> </ul>                                               | <ul style="list-style-type: none"> <li>▪ Younger participants had a better adherence</li> <li>▪ Higher educated patients had a better adherence</li> </ul> <p>(authors suggest that these (above) findings might be due to internet-skills; were not measured)</p> <ul style="list-style-type: none"> <li>▪ Referral by health professional and more severe complaints are associated with better adherence</li> <li>▪ Higher levels of 'disfunctional thinking' are associated with better adherence</li> </ul> |
| [2] Bendelin,<br>2011 (SWE)     | Online self-help CBT for depression with minimal therapist contact<br>Duration: 8 weeks<br>Target group: General public; mild to moderate symptoms             | Qualitative study with patient (user) interviews                                                  | <p>From the thematic analysis themes emerged: work process, motivation, attitude consequences.</p> <p>Division of patients into "readers", "strivers" and "doers" can be made.</p> | <p>Barriers:</p> <ul style="list-style-type: none"> <li>▪ Difficulty bringing theoretical (reading) content into practice (readers)</li> <li>▪ Difficulty deciding on workload and pace</li> <li>▪ Lack of support/extrinsic motivator</li> <li>▪ Scepticism about online therapy</li> </ul> <p>Motivators:</p> <ul style="list-style-type: none"> <li>▪ No difficulties bringin theoretical (reading content into practice (doers)</li> <li>▪ Structured way of working</li> <li>▪ Independence</li> </ul>      |
| [3]<br>Cavanagh,<br>2009 (UK)   | Beating the blues; CCBT program consisting of clinic visits with short face-to-face support meetings<br>Duration: 8 sessies<br>Target group: patients referred | Evaluation of the program via questionnaires. Between-group differences are analyzed with t-tests | Predictors of program completion and effect:<br>Demographics<br>Computer experience<br>CBT credibility<br>Attitudes to CBT                                                         | Only treatment credibility en positive expectations of CCBT predicted treatment completion                                                                                                                                                                                                                                                                                                                                                                                                                       |

|                         |                                                                                                                                                                                                  |                                                                                               |                                                                                                                                                                                                   |                                                                                                                                                                                                                                                                                                                                                                                                                                                                                                                                                                                                  |
|-------------------------|--------------------------------------------------------------------------------------------------------------------------------------------------------------------------------------------------|-----------------------------------------------------------------------------------------------|---------------------------------------------------------------------------------------------------------------------------------------------------------------------------------------------------|--------------------------------------------------------------------------------------------------------------------------------------------------------------------------------------------------------------------------------------------------------------------------------------------------------------------------------------------------------------------------------------------------------------------------------------------------------------------------------------------------------------------------------------------------------------------------------------------------|
|                         | by GP or community health care professionals.                                                                                                                                                    |                                                                                               |                                                                                                                                                                                                   |                                                                                                                                                                                                                                                                                                                                                                                                                                                                                                                                                                                                  |
| [4] Donkin, 2012 (AUS)  | e-Couch: self-help CBT intervention for cardiovascular risk patients suffering from depression.<br>Duration: 12 weeks<br>Target group: cardiovascular risk patients                              | Qualitative study by means of patient (user) interviews                                       | From thematic analyses barriers and motivators emerged                                                                                                                                            | Important barriers that were found are: <ul style="list-style-type: none"> <li>▪ Time constraints</li> <li>▪ Competing priorities/forgetting it</li> <li>▪ Problems regarding mood and anxiety</li> <li>▪ Computer 'frustrations'</li> <li>▪ Lack of trust in therapeutic relationship via computer/lack of personalisation</li> </ul> Important motivators are: <ul style="list-style-type: none"> <li>▪ Intrinsic motivation/persistence</li> <li>▪ Sense of control/work in own time and pace</li> <li>▪ Creating a habit/daily routine</li> <li>▪ Identification with the program</li> </ul> |
| [5] Farrer, 2014 (AUS)  | MoodGYM: Self-administered psychoeducation and CBT intervention (web only and web with tracking)<br>Duration: 6 weeks<br>Target group: callers to a national crisis telephone counseling service | Linear regression analysis<br>+ extra assessment of reasons for dropout among 10 participants | <ul style="list-style-type: none"> <li>▪ Demographic variables (age, sex, education, marital status, employment)</li> <li>▪ Baseline depression severity</li> <li>▪ Motivation (NML-P)</li> </ul> | Better adherence with: <ul style="list-style-type: none"> <li>▪ Higher levels of education</li> <li>▪ Higher levels of motivation</li> <li>▪ younger age</li> <li>▪ lower levels of baseline depression</li> </ul> Extra assessment dropout reasons: <ul style="list-style-type: none"> <li>▪ lack of time</li> <li>▪ feeling too depressed</li> <li>▪ slow or unreliable Internet connection</li> <li>▪ intervention contained too much text</li> <li>▪ CBT was too complicated to understand</li> </ul>                                                                                        |
| [6] Gerhards, 2011 (NL) | Colour your life: online CBT self help program for depression.<br>Duration: 9 weeks<br>Target group: General public; mild to moderate symptoms                                                   | Qualitative study by means of patient (user) interviews                                       | From thematic analyses barriers and motivators emerged                                                                                                                                            | Important barriers are: <ul style="list-style-type: none"> <li>▪ Lack of identification with the program</li> <li>▪ Lack of support (for discipline)</li> <li>▪ Inadequate computer/internet skills</li> <li>▪ No access to equipment</li> <li>▪ Location of the computer (no privacy)</li> </ul>                                                                                                                                                                                                                                                                                                |
| [7] Hedman, 2012 (SWE)  | Cognitive behavioral therapy for SAD in group sessions                                                                                                                                           | Regression analysis                                                                           | Predictors and moderators; demographic, therapy-                                                                                                                                                  | Better treatment response in case of: <ul style="list-style-type: none"> <li>▪ working full time</li> </ul>                                                                                                                                                                                                                                                                                                                                                                                                                                                                                      |

|                            |                                                                                                                                                                                                   |                                                                                                     |                                                                                                                                                                                                                                          |                                                                                                                                                                                                                                 |
|----------------------------|---------------------------------------------------------------------------------------------------------------------------------------------------------------------------------------------------|-----------------------------------------------------------------------------------------------------|------------------------------------------------------------------------------------------------------------------------------------------------------------------------------------------------------------------------------------------|---------------------------------------------------------------------------------------------------------------------------------------------------------------------------------------------------------------------------------|
|                            | Duration: 15 weeks<br>Target group: patients in primary care                                                                                                                                      |                                                                                                     | process related, genetic and clinical.                                                                                                                                                                                                   | <ul style="list-style-type: none"> <li>▪ having children</li> <li>▪ less depressive symptoms</li> <li>▪ higher expectancy of treatment effectiveness</li> </ul>                                                                 |
| [8] Kelders, 2013 (NL)     | Voluit leven(living to the full): online ACT self-help program for depression with email support.<br>Duration: 9 weeks<br>Target group: general public; mild to moderate symptoms                 | Correlation analysis<br>Logistic regression<br><br>Log data analysis of use data                    | <ul style="list-style-type: none"> <li>▪ Demographic variables</li> <li>▪ need for cognition</li> <li>▪ need to belong</li> <li>▪ internet usage</li> <li>▪ internet experience</li> <li>▪ use during intervention (log data)</li> </ul> | Adherers used the internet more often than non-adherers, were most often female, had a higher Need for cognition. Adherers logged on more often and spent more time loggen on per session.                                      |
| [9] Neil, 2009 (AUS)       | MoodGYM: self-help program for fear and depression based on CBT; self-directed program with monitoring/teacher support (in classroom)<br>Duration: 5 weeks<br>Target group: community adolescents | Linear regression analysis and t-tests to measure differences between support/no support.           | Demographic variables<br>Severity of depression<br>Setting (with/without classroom support)                                                                                                                                              | Adherers were more often enrolled in the school-based setting (monitored), were more often female and had severer levels of depression. In the condition without monitoring motivation was important to reach treatment effect. |
| [10] Nordgreen, 2012 (NOR) | Self-help for SAD                                                                                                                                                                                 | Comparisons between guided self-help & unguided self-help by means of t-test en logistic regression | Pretreatment symptoms<br>Program factors                                                                                                                                                                                                 | 'Credibility' of the intervention was associated with better adherence (more modules completed), both for guided and unguided)                                                                                                  |
| [11] Spek, 2008 (NL)       | Colour your life: group treatment vs. online self-help.<br>Duration: 9 weeks<br>Target group: General public; sub-threshold depression                                                            | Predictors of therapy outcomes by means of ANCOVA                                                   | <ul style="list-style-type: none"> <li>▪ BDI scores</li> <li>▪ Demographics</li> <li>▪ Five main personality characteristics (Openness, Conscientiousness, Extraversion, Agreeableness, Neuroticism)</li> </ul>                          | Neuroticisme is associated with worse outcomes in CCBT                                                                                                                                                                          |

|                                           |                                                                                                                                                    |                                     |                                                                                                                                                                                                                                                                             |                                                                                            |
|-------------------------------------------|----------------------------------------------------------------------------------------------------------------------------------------------------|-------------------------------------|-----------------------------------------------------------------------------------------------------------------------------------------------------------------------------------------------------------------------------------------------------------------------------|--------------------------------------------------------------------------------------------|
| <p>[12]<br/>Vangberg,<br/>2012 (NOR)</p>  | <p>MoodGYM: prevention and treatment of depression; self-directed without support<br/>Duration: 5 weeks<br/>Target group: high school students</p> | <p>Regression analysis</p>          | <ul style="list-style-type: none"> <li>▪ temperament = novelty seeking, harm avoidance, reward dependence, persistence</li> <li>▪ character = self-directedness, cooperativeness, self-transcendence</li> <li>▪ self-efficacy</li> <li>▪ gender</li> <li>▪ CES-D</li> </ul> | <p>Predicting outcomes for use were CES-D (rate of depressive) and 'reward dependence'</p> |
| <p>[13]<br/>Wojtowicz,<br/>2013 (CAN)</p> | <p>A guided online anxiety, depression, and stress self-help program for university students</p>                                                   | <p>Multiple regression analysis</p> | <ul style="list-style-type: none"> <li>▪ Age</li> <li>▪ Symptom severity</li> <li>▪ Beliefs and attitudes (TPB)</li> </ul>                                                                                                                                                  | <p>Perceived behavioural control and age predict the amount of finished modules.</p>       |

**Table 2.** Systematic reviews on use/adherence/acceptance of CCBT via eHealth for depression and anxiety.

| Artikel                        | Focus                                                                              | Outcome measurements                                                                                                                      | Results                                                                                                                                                                                                                                                                                                                                                                                                                                                                       | Conclusions                                                                                                                                                                                                                                   |
|--------------------------------|------------------------------------------------------------------------------------|-------------------------------------------------------------------------------------------------------------------------------------------|-------------------------------------------------------------------------------------------------------------------------------------------------------------------------------------------------------------------------------------------------------------------------------------------------------------------------------------------------------------------------------------------------------------------------------------------------------------------------------|-----------------------------------------------------------------------------------------------------------------------------------------------------------------------------------------------------------------------------------------------|
| [14] Christensen, 2009 (AUS)   | Adherence of self-help CCBT interventions (open access) for anxiety and depression | <ul style="list-style-type: none"> <li>▪ Drop-out</li> <li>▪ Compliance</li> <li>▪ Predictors of adherence</li> </ul>                     | <ul style="list-style-type: none"> <li>▪ Increased adherence: lower baseline depression, younger age, poorer knowledge of treatment.</li> <li>▪ Reasons for drop-out: time constraints, lack of motivation, technical problems, lack of face-to-face contact, perceived lack of effect, burden of the program</li> </ul>                                                                                                                                                      | Little is known about factors that improve adherence. Studies differ too much in their approach to allow for comparisons and web-based data collection should be used more often.                                                             |
| [15] Kaltenthaler, 2008 (UK)   | Acceptability of CCBT interventions for patients with mild to moderate depression  | <ul style="list-style-type: none"> <li>▪ Recruitment rates</li> <li>▪ Drop-outs</li> <li>▪ Reported acceptability/satisfaction</li> </ul> | <ul style="list-style-type: none"> <li>▪ Recruitment data is of limited worth, because it often concerns self-selection.</li> <li>▪ Drop-out rates varied from 0 to 75%, these figures are comparable to regular CBT. Calculation of drop-out differs and reasons for drop-out are supplied scarcely.</li> <li>▪ Data on acceptability are only available for participants who completed the intervention, these participants mostly rate acceptability positively</li> </ul> | Studies differ strongly regarding design, study population, recruitment and content of the intervention. Little information is given on drop-out and satisfaction. Research into initial engagement, continuation and satisfaction is needed. |
| [16] Waller, 2009 (UK)         | Barriers to uptake of CCBT for anxiety and depression                              | <ul style="list-style-type: none"> <li>▪ Acceptability</li> <li>▪ Accessibility</li> </ul>                                                | <ul style="list-style-type: none"> <li>▪ Reasons for drop-out: lack of time, 'therapy' (but unclear whether it applies to participants in cCBT, control, or both)</li> <li>▪ Satisfaction in qualitative studies is often high. Negative experiences include: too demanding, patronizing, fast-paced, computer was 'cold'</li> <li>▪ Accessibility was related to computer literacy (experience)</li> </ul>                                                                   | Studies zijn erg heterogeen in focus, methodologie en kwaliteit. Kwalitatieve data is van belang. De belangrijkste barrières lijken computer/internet toegang, tijdsinvestering en computer/internet vaardigheden.                            |
| [17] Or, 2008 (Hong Kong & US) | Patient acceptance of self-care or primary care services                           | Variables for Health Information Technology acceptance                                                                                    | <ul style="list-style-type: none"> <li>▪ Broad search, including e.g., informative websites, decision aids, and e-consult.</li> <li>▪ 94 individual factors found, related to the individual (=71% of all identified factors; socio-demographics, skills,</li> </ul>                                                                                                                                                                                                          | The authors plead for a holistic approach to the development, implementation, and evaluation of eHealth interventions, with a stronger focus on the system and the                                                                            |

|                               |                        |                                                                                                               |                                                                                                                                                                                                                                                                                                                                                                                                                                                                                                                                          |                                                                                                                                                                                                                                                                   |
|-------------------------------|------------------------|---------------------------------------------------------------------------------------------------------------|------------------------------------------------------------------------------------------------------------------------------------------------------------------------------------------------------------------------------------------------------------------------------------------------------------------------------------------------------------------------------------------------------------------------------------------------------------------------------------------------------------------------------------------|-------------------------------------------------------------------------------------------------------------------------------------------------------------------------------------------------------------------------------------------------------------------|
|                               |                        |                                                                                                               | <p>experience), other factors are related to human-technology interaction, organizational and environmental factors.</p> <ul style="list-style-type: none"> <li>▪ Studies give little theoretical support for their study goals. Therefore, meta-analyses are difficult to perform</li> <li>▪ Demographic variables showed no or inconsistent effects (they are possibly moderators for computer literacy, fear, or experience)</li> <li>▪ Computer- experience and human-technology interaction is predictive for acceptance</li> </ul> | <p>organization. TAM, perceived usefulness and ease of use should be applied more often in studies, as well as computer self-efficacy. Environmental factors and social factors can play a role as well (privacy, quiet place to work, social support (UTAUT)</p> |
| [18]<br>Donkin,<br>2011 (AUS) | Adherence to e-therapy | <ul style="list-style-type: none"> <li>▪ Adherence</li> <li>▪ Effect of adherence on effectiveness</li> </ul> | <ul style="list-style-type: none"> <li>▪ Way of measuring adherence differs</li> <li>▪ Regarding depression: completion of modules and general 'website exposure' was related to better outcomes</li> </ul>                                                                                                                                                                                                                                                                                                                              | It seems that interaction with the system improves the treatment effect, not solely the use of the system. This is an important nuance.                                                                                                                           |

## References

1. Batterham PJ, et al., Predictors of adherence among community users of a cognitive behavior therapy website. Patient preference and adherence 2008; 2: 97. PMID: PMC2770409
2. Bendelin N, et al., Experiences of guided Internet-based cognitive-behavioural treatment for depression: a qualitative study. BMC psychiatry 2011; 11(1): 107. PMID: 21718523
3. Cavanagh K, et al., The acceptability of computer-aided cognitive behavioural therapy: a pragmatic study. Cognitive behaviour therapy 2009; 38(4): 235-246. DOI:10.1080/16506070802561256
4. Donkin L, and Glozier N, Motivators and motivations to persist with online psychological interventions: a qualitative study of treatment completers. Journal of medical Internet research 2012; 14(3):e91. PMID: 22743581
5. Farrer LM, et al., Predictors of Adherence and Outcome in Internet-Based Cognitive Behavior Therapy Delivered in a Telephone Counseling Setting. Cognitive therapy and research 2014; 38(3): 358-367. DOI 10.1007/s10608-013-9589-1
6. Gerhards S, et al., Improving adherence and effectiveness of computerised cognitive behavioural therapy without support for depression: a qualitative study on patient experiences. Journal of affective disorders 2011; 129(1): 117-125. DOI 10.1016/j.jad.2010.09.012

7. Hedman E, et al., Clinical and genetic outcome determinants of Internet-and group-based cognitive behavior therapy for social anxiety disorder. *Acta Psychiatrica Scandinavica* 2012; 126(2): 126-136. DOI 10.1111/j.1600-0447.2012.01834.x
8. Kelders SM, Bohlmeijer ET, & van Gemert-Pijnen JEWG, Participants, usage, and use patterns of a web-based intervention for the prevention of depression within a randomized controlled trial. *Journal of medical Internet research* 2013; 15(8), e172. DOI 10.2196/jmir.2258. PMID: 3757912
9. Neil AL, et al., Predictors of adherence by adolescents to a cognitive behavior therapy website in school and community-based settings. *Journal of Medical Internet Research* 2009; 11(1): e6. PMID: 19275982
10. Nordgreen T, et al., Outcome predictors in guided and unguided self-help for social anxiety disorder. *Behaviour research and therapy* 2012; 50(1): 13-21. DOI 10.1016/j.brat.2011.10.009
11. Spek V, et al., Predictors of outcome of group and internet-based cognitive behavior therapy. *Journal of affective disorders* 2008; 105(1): 137-145. DOI 10.1016/j.jad.2007.05.001
12. Vangberg HCB, et al., Does personality predict depression and use of an internet-based intervention for depression among adolescents? *Depression research and treatment* 2012; 2012. doi:10.1155/2012/593068
13. Wojtowicz M, Day V, McGrath PJ, Predictors of participant retention in a guided online self-help program for university students: prospective cohort study. *Journal of medical Internet research* 2013; 15(5): e96. DOI 10.2196/jmir.2323. PMID: 23697614
14. Christensen H, Griffiths KM, Farrer L, Adherence in Internet interventions for anxiety and depression: systematic review. *J Med Internet Res* 2009; 11(2): e13. DOI 10.2196/jmir.1194. PMID: 19403466
15. Kaltenthaler E, et al., The acceptability to patients of computerized cognitive behaviour therapy for depression: a systematic review. *Psychological medicine* 2008; 38(11): 1521-1530. DOI 10.1017/S0033291707002607
16. Waller R, Gilbody S, Barriers to the uptake of computerized cognitive behavioural therapy: a systematic review of the quantitative and qualitative evidence. *Psychological medicine* 2009;39(5): 705. DOI 10.1017/S0033291708004224
17. Or CK, Karsh B-T, A systematic review of patient acceptance of consumer health information technology. *Journal of the American Medical Informatics Association* 2009; 16(4): 550-560. DOI 10.1197/jamia.M2888. PMID: 19390112
18. Donkin L, et al., A systematic review of the impact of adherence on the effectiveness of e-therapies. *Journal of medical Internet research* 2011; 13(3); e52. DOI 10.2196/jmir.1772. PMID: 3222162
